# Supplementary material for: Comparison of Absorbable and Nonabsorbable Sutures for Intradermal Skin Closure in Dogs
Source: MDPI journal article supplement (doi:10.3390/vetsci10020105), 2023-02-01
Supplement: s1 [file s1]

Supplementary Material

Table S1. Scoring system of clinical evaluation

| CLINICAL EVALUATION                                                        | Score 0                                                                                               | Score 1           | Score 2            | Score 3                                             |
|----------------------------------------------------------------------------|-------------------------------------------------------------------------------------------------------|-------------------|--------------------|-----------------------------------------------------|
| Skin thickening                                                            | measured with a tuberculin skin testing ruler at the central part of the incision, in mm              |                   |                    |                                                     |
| Erythema                                                                   | width of skin redness at the central part of the incision, measured with an electronic caliper, in mm |                   |                    |                                                     |
| Scar width                                                                 | measured with an electronic caliper, in the central part of the incision, in mm                       |                   |                    |                                                     |
| Abscessation or inflammation                                               | absence                                                                                               | mild inflammation | 1-2 microabscesses | intense inflammation, or more than 3 microabscesses |
| Exudate                                                                    | absence                                                                                               | serosanguineous   | seropurulent       | purulent                                            |
| Comedones                                                                  | absence                                                                                               | 1-3               | 4-6                | more than 7                                         |
| Hyperpigmentation of the wound area, compared with the adjacent skin color | absence                                                                                               | mild              | moderate           | intense                                             |
| Lack of hair regrowth                                                      | none                                                                                                  | light             | mild               | severe                                              |
| Suture loss                                                                | number of sutures removed                                                                             |                   |                    |                                                     |
| Wound dehiscence                                                           | Length in cm                                                                                          |                   |                    |                                                     |
| Suture marks                                                               | absence                                                                                               | 1-2 marks         | 3-6 marks          | more than 7                                         |

**Table T2.** Scoring system of histological evaluation

| HISTOLOGICAL EVALUATION               | Score 0                                                                                                                                                            | Score 1                                                                                                                         | Score 2                                                             | Score 3                                         |
|---------------------------------------|--------------------------------------------------------------------------------------------------------------------------------------------------------------------|---------------------------------------------------------------------------------------------------------------------------------|---------------------------------------------------------------------|-------------------------------------------------|
| Necrosis [1]                          | none identified                                                                                                                                                    | few scattered areas                                                                                                             | multiple focal dense areas                                          | necrosis present throughout the slide           |
| Epithelial gap [2]                    |                                                                                                                                                                    | mm                                                                                                                              |                                                                     |                                                 |
| Oedema [4]                            | absence of oedema, normal,                                                                                                                                         | slight separation of cells and collagen from each other in the wound tissue by non-stained or poorly stained acellular material | separation of approximately 30 to 50 µm by this acellular material, | separation of > 50 µm)                          |
| Inflammation [3]                      | <3 cells/field evaluated by scoring neutrophils, eosinophils, macrophages, lymphocytes, plasma cells, and mast cells detected in 10 high power fields (HPF) (400x) | 3-10 cells/field                                                                                                                | 11-30 cells/field                                                   | >31 cells/field                                 |
| Presence of suture [2]                | absence of suture material                                                                                                                                         | presence of a small part of the suture material,                                                                                | presence of large part of the suture material,                      | presence of the entire suture material          |
| Tissue reaction around the suture [3] | 0-2 cell layers around suture tract                                                                                                                                | 3-5 cell layers around suture tract                                                                                             | 6-10 cell layers around suture tract                                | >10 cell layers around suture tract             |
| Epithelial thickness [3]              | as a percent proportion of normal epithelial thickness as was measured at the edge of the sample                                                                   |                                                                                                                                 |                                                                     |                                                 |
| Scar width [2]                        |                                                                                                                                                                    | mm                                                                                                                              |                                                                     |                                                 |
| Collagen synthesis [1, 4]             | no collagen                                                                                                                                                        | scant collagen bundles slightly separating fibroblasts                                                                          | dense accumulations of collagen between fibroblasts                 | extensive separation of fibroblasts by collagen |
| Presence of fibroblasts [1, 4]        | <3 fibroblasts/field 400x                                                                                                                                          | 3-10 fibroblasts/field 400x                                                                                                     | 11-30 fibroblasts/field 400x                                        | >31 fibroblasts/field 400x                      |
| Angiogenesis [1,4]                    | <3 capillary buds/field 400x                                                                                                                                       | 3-10 capillary buds/field 400x                                                                                                  | 11-30 capillary buds/field 400x                                     | >31 capillary buds/field 400x                   |

[1] Winkler, J.T.; Swaim, S.F.; Sartin, E.A.; Henderson, R.A.; Welch, J.A. The effect of a porcine-derived small intestinal submucosa product on wounds with exposed bone in dogs. *Vet Surg* **2002**, *31*, 541-551, doi:10.1053/jvet.2002.34669.

[2] Gouletsou, P.G.; Prassinos, N.N.; Papazoglou, L.G.; Kostoulas, P.; Galatos, A.D. Comparison of continuous intradermal with simple interrupted suture pattern: an experimental study in dogs. *Top Companion Anim Med* **2020**, *41*, 100454, doi:10.1016/j.tcam.2020.100454.

[3] Kirpensteijn, J.; Maarschalkerweerd, R.J.; Koeman, J.P.; Kooistra, H.S.; van Sluijs, F.J. Comparison of two suture materials for intradermal skin closure in dogs. *Vet Q* **1997**, *19*, 20-22, doi:10.1080/01652176.1997.9694732.

[4] Gillette, R.L.; Swaim, S.F.; Sartin, E.A.; Bradley, D.M.; Coolman, S.L. Effects of a bioactive glass on healing of closed skin wounds in dogs. *Am J Vet Res* **2001**, *62*, 1149-1153, doi:10.2460/ajvr.2001.62.1149.
